# Supplementary material for: Gadolinium/DOTA functionalized poly(ethylene glycol)-block-poly(acrylamide-co-acrylonitrile) micelles with synergistically enhanced cellular uptake for cancer theranostics
Source: Royal Society of Chemistry journal article supplement (doi:10.1039/c6ra04038a), 2016-01-01
Supplement: c6ra04038a1.pdf [file c6ra04038a1.pdf]

Electronic Supplementary Information (ESI) for RSC Advances

*Supplementary Information*

**Gadolinium/DOTA functionalized poly(ethylene glycol)-*block*-  
poly(acrylamide-*co*-acrylonitrile) micelles with synergistically  
enhanced cellular uptake for cancer theranostics**

Guoquan Tong <sup>a,c</sup>, Zhuangnian Fang <sup>b</sup>, Gang Huang <sup>a,d</sup>, Yihan Jing <sup>a,c</sup>, Shulin Dai <sup>a,c</sup>,

Qing Jiang <sup>a,c</sup>, Chao Zhang<sup>\*, a, c</sup>, Shi-Ting Feng<sup>\*, b</sup>, Zi-Ping Li<sup>\*, b</sup>

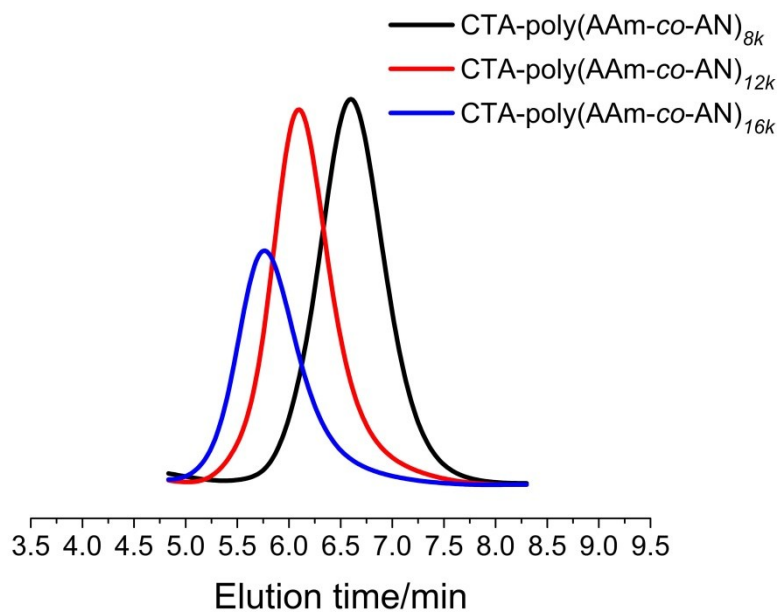

**Fig. S1** GPC traces recorded for (a) CTA-poly(AAm-co-AN)<sub>8k</sub> ( $M_n = 7903$ ,  $M_w/M_n = 1.143$ ), (b) CTA-poly(AAm-co-AN)<sub>12k</sub> ( $M_n = 11589$ ,  $M_w/M_n = 1.146$ ), (c) CTA-poly(AAm-co-AN)<sub>16k</sub> ( $M_n = 15146$ ,  $M_w/M_n = 1.056$ ).

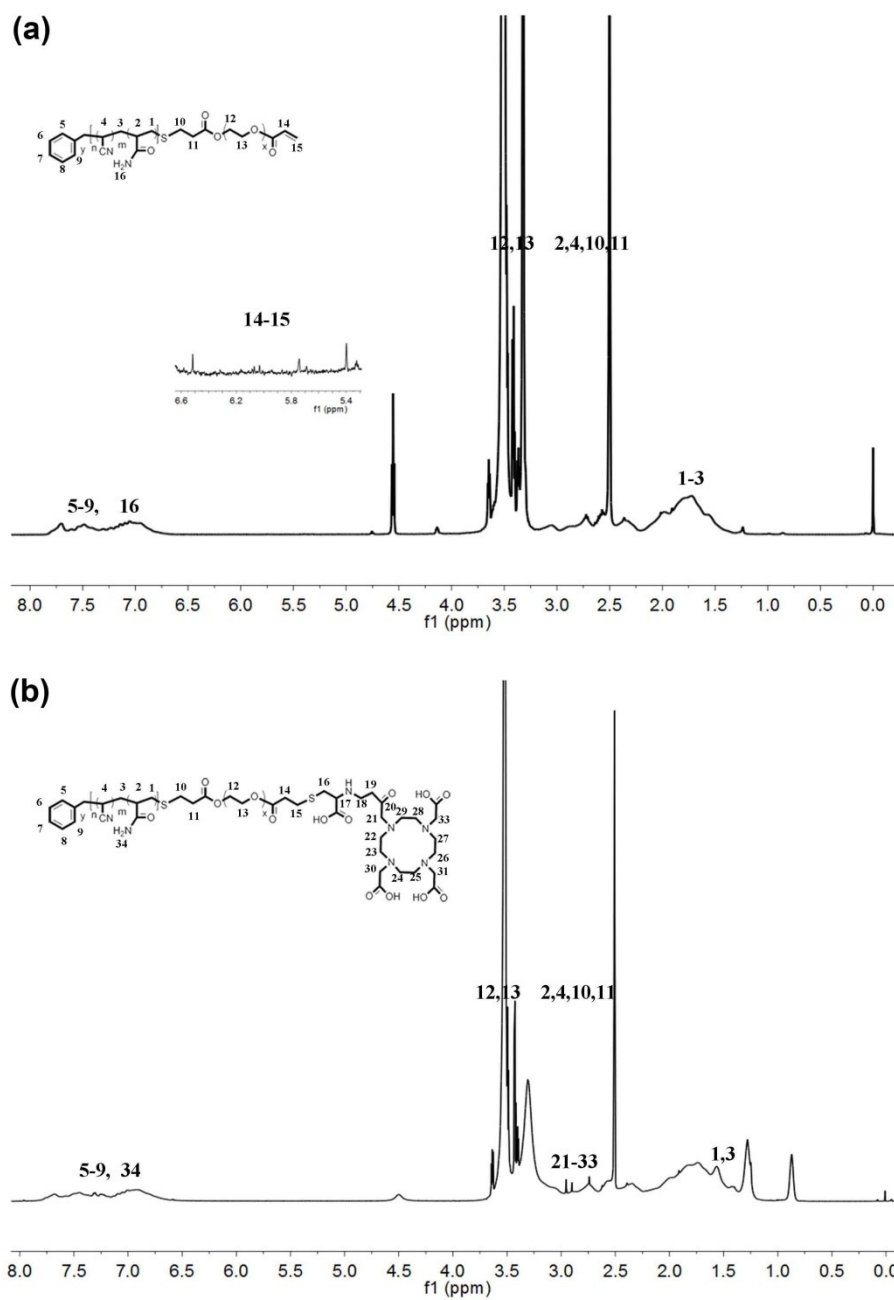

**Fig. S2**  $^1\text{H}$  NMR spectra of (a) Acrylate-PEG-*b*-poly(AAm-*co*-AN) in  $\text{DMSO-d}_6$ , (b) DOTA-PEG-*b*-poly(AAm-*co*-AN) in  $\text{DMSO-d}_6$ (b).

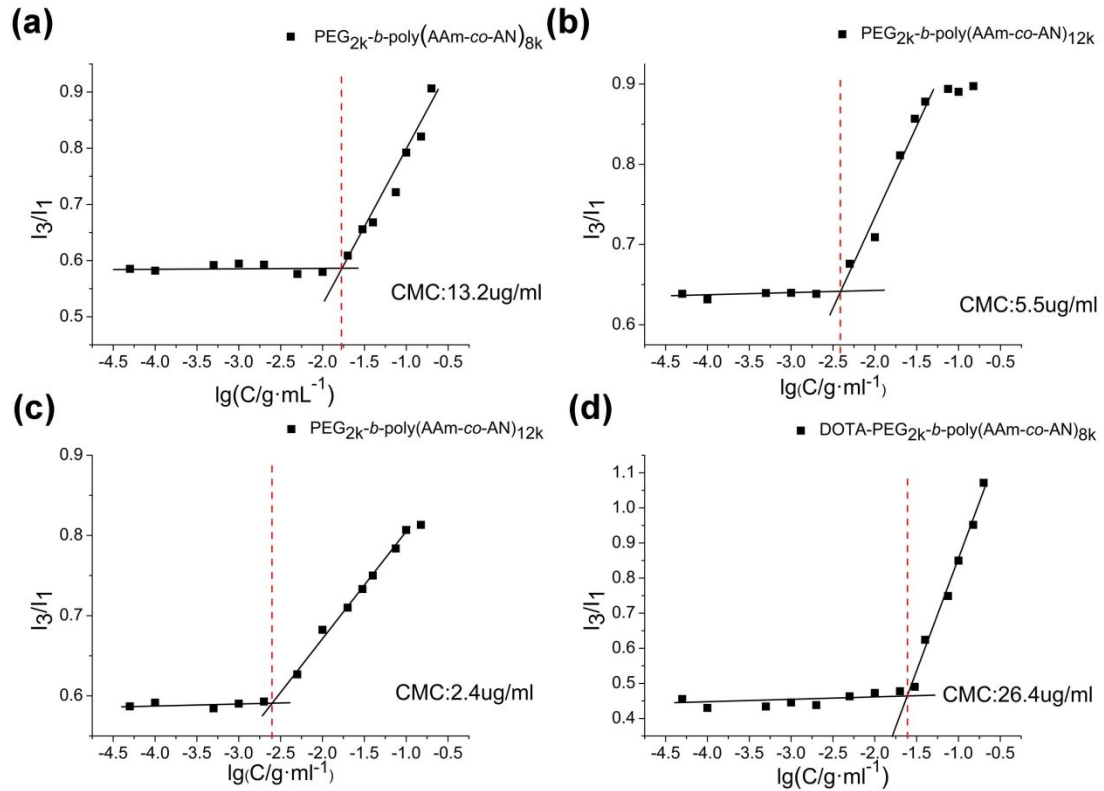

Fig.S3 Critical Micelle Concentration of (a) PEG<sub>2k</sub>-b-poly(AAm-co-AN)<sub>8k</sub>, (b) DOTA-PEG<sub>2k</sub>-b-poly(AAm-co-AN)<sub>8k</sub>, (c) PEG<sub>2k</sub>-b-poly(AAm-co-AN)<sub>12k</sub>, (d) PEG<sub>2k</sub>-b-poly(AAm-co-AN)<sub>16k</sub>

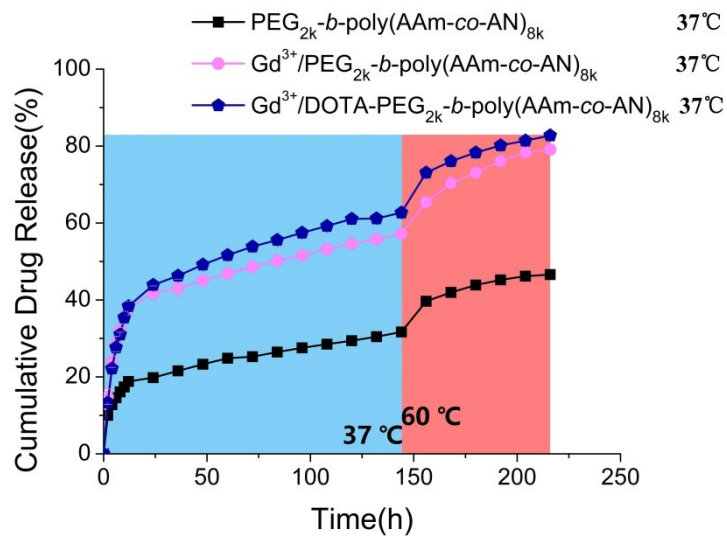

Fig.S4 Effect of Gd<sup>3+</sup> on cumulative drug release.

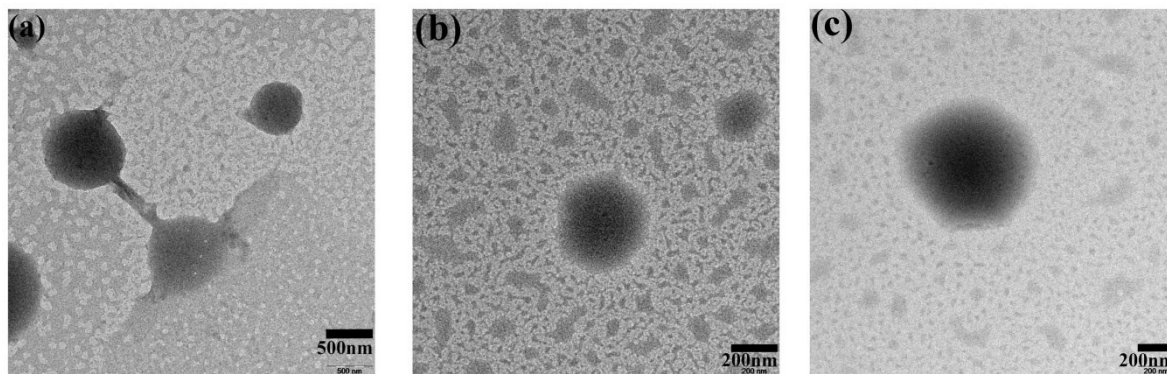

Fig.S5 Effect of cumulative drug release on PEG<sub>2k</sub>-*b*-poly(AAm-*co*-AN)<sub>8k</sub> micelle structure. a) Before release; b) 24 hours after release; c) 48 hours after release.

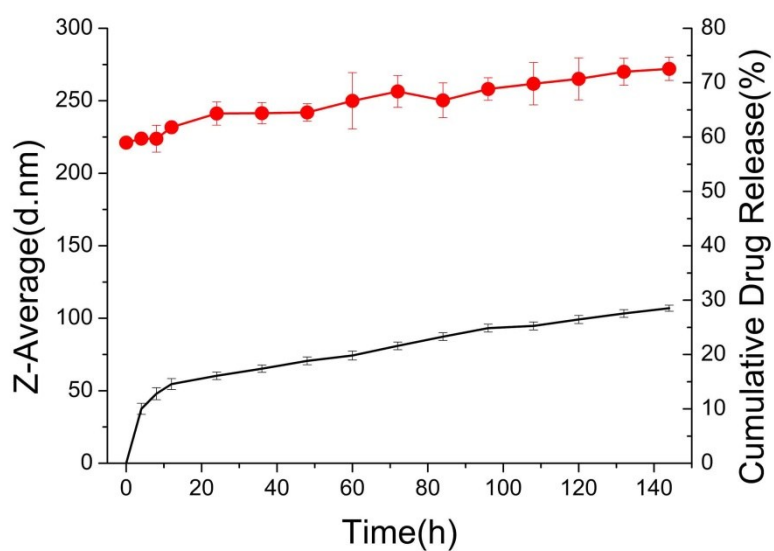

Fig.S6 Effect of cumulative drug release on hydrated size of PEG<sub>2k</sub>-*b*-poly(AAm-*co*-AN)<sub>8k</sub> micelle.

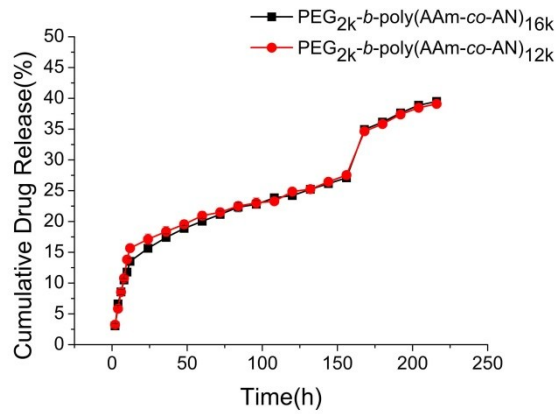

Fig.S7 Cumulative release of DOX from PEG<sub>2k</sub>-*b*-poly(AAm-co-AN)<sub>12k</sub> and PEG<sub>2k</sub>-*b*-poly(AAm-co-AN)<sub>16k</sub> micelles

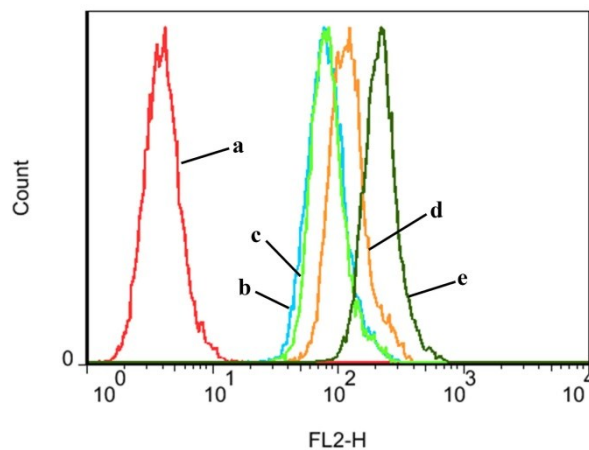

Fig.S8 Flow cytometric analysis of BEL-7402 cells after 2h incubation with (b-e) free DOX, PEG<sub>2k</sub>-*b*-poly(AAm-co-AN)<sub>16k</sub>, DOTA-PEG<sub>2k</sub>-*b*-poly(AAm-co-AN)<sub>16k</sub>, Gd<sup>3+</sup>/DOTA-PEG<sub>2k</sub>-*b*-poly(AAm-co-AN)<sub>16k</sub> micelles and (a) was blank. (DOX concentration 10 ug/mL)
